# Supplementary material
Source: publisher site journal article supplement (https://www.dovepress.com/article/429903)

**Survival prediction model for patients with hepatocellular carcinoma and extrahepatic metastasis**

**based on XGBoost algorithm**

**Short title:** Survival prediction of advanced HCC patients

**Authors:** Jihye Lim1, Hyeon-Gi Jeon2, Yeonjoo Seo1, Moonjin Kim3, Ja Un Moon4, and Se Hyun Cho1

**Table of contents**

- Supplementary Figure 1. Survival probability of hepatocellular carcinoma (HCC) patients with extrahepatic metastasis.
- Supplementary Figure 2. Decision trees for (A) 3-, (B) 6-, and (C) 12- months survival prediction model.

**Supplementary Figure 1.** Survival probability of hepatocellular carcinoma (HCC) patients with extrahepatic metastasis.

(A) Child-Pugh class, (B) number of tumors, (C) size of tumor, (D) vascular or bile duct invasion, (E) metastatic site, and (F) primary anti-HCC treatment


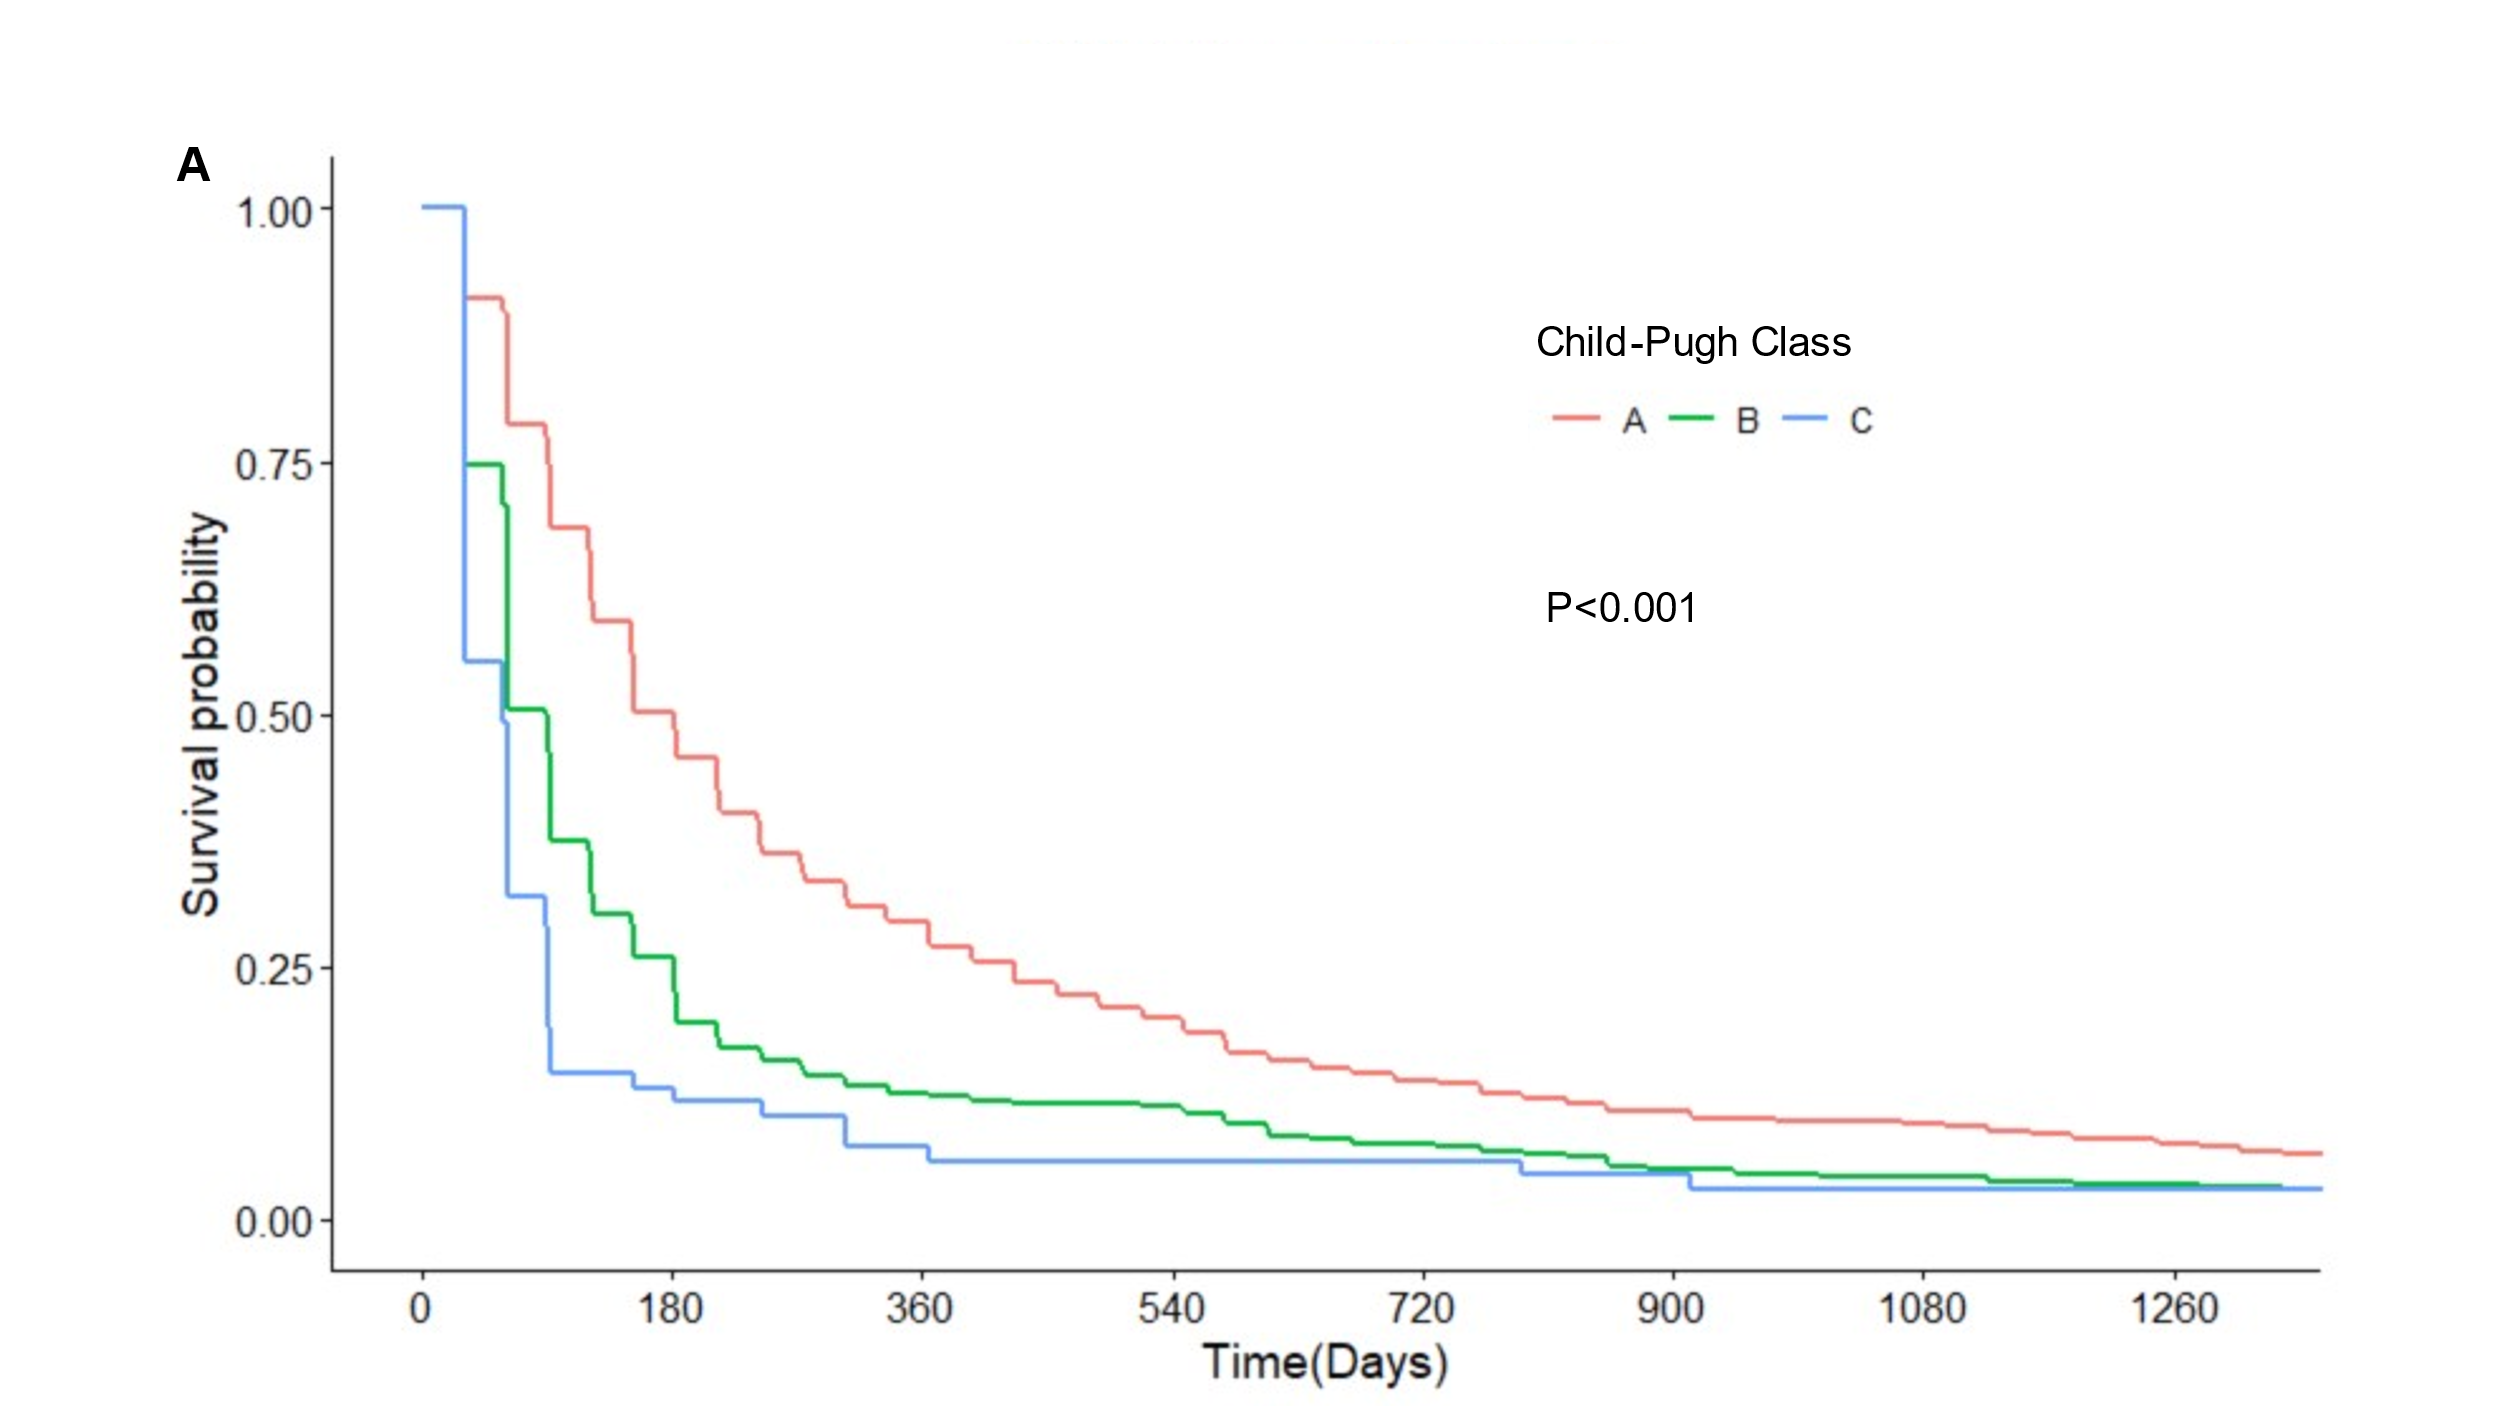


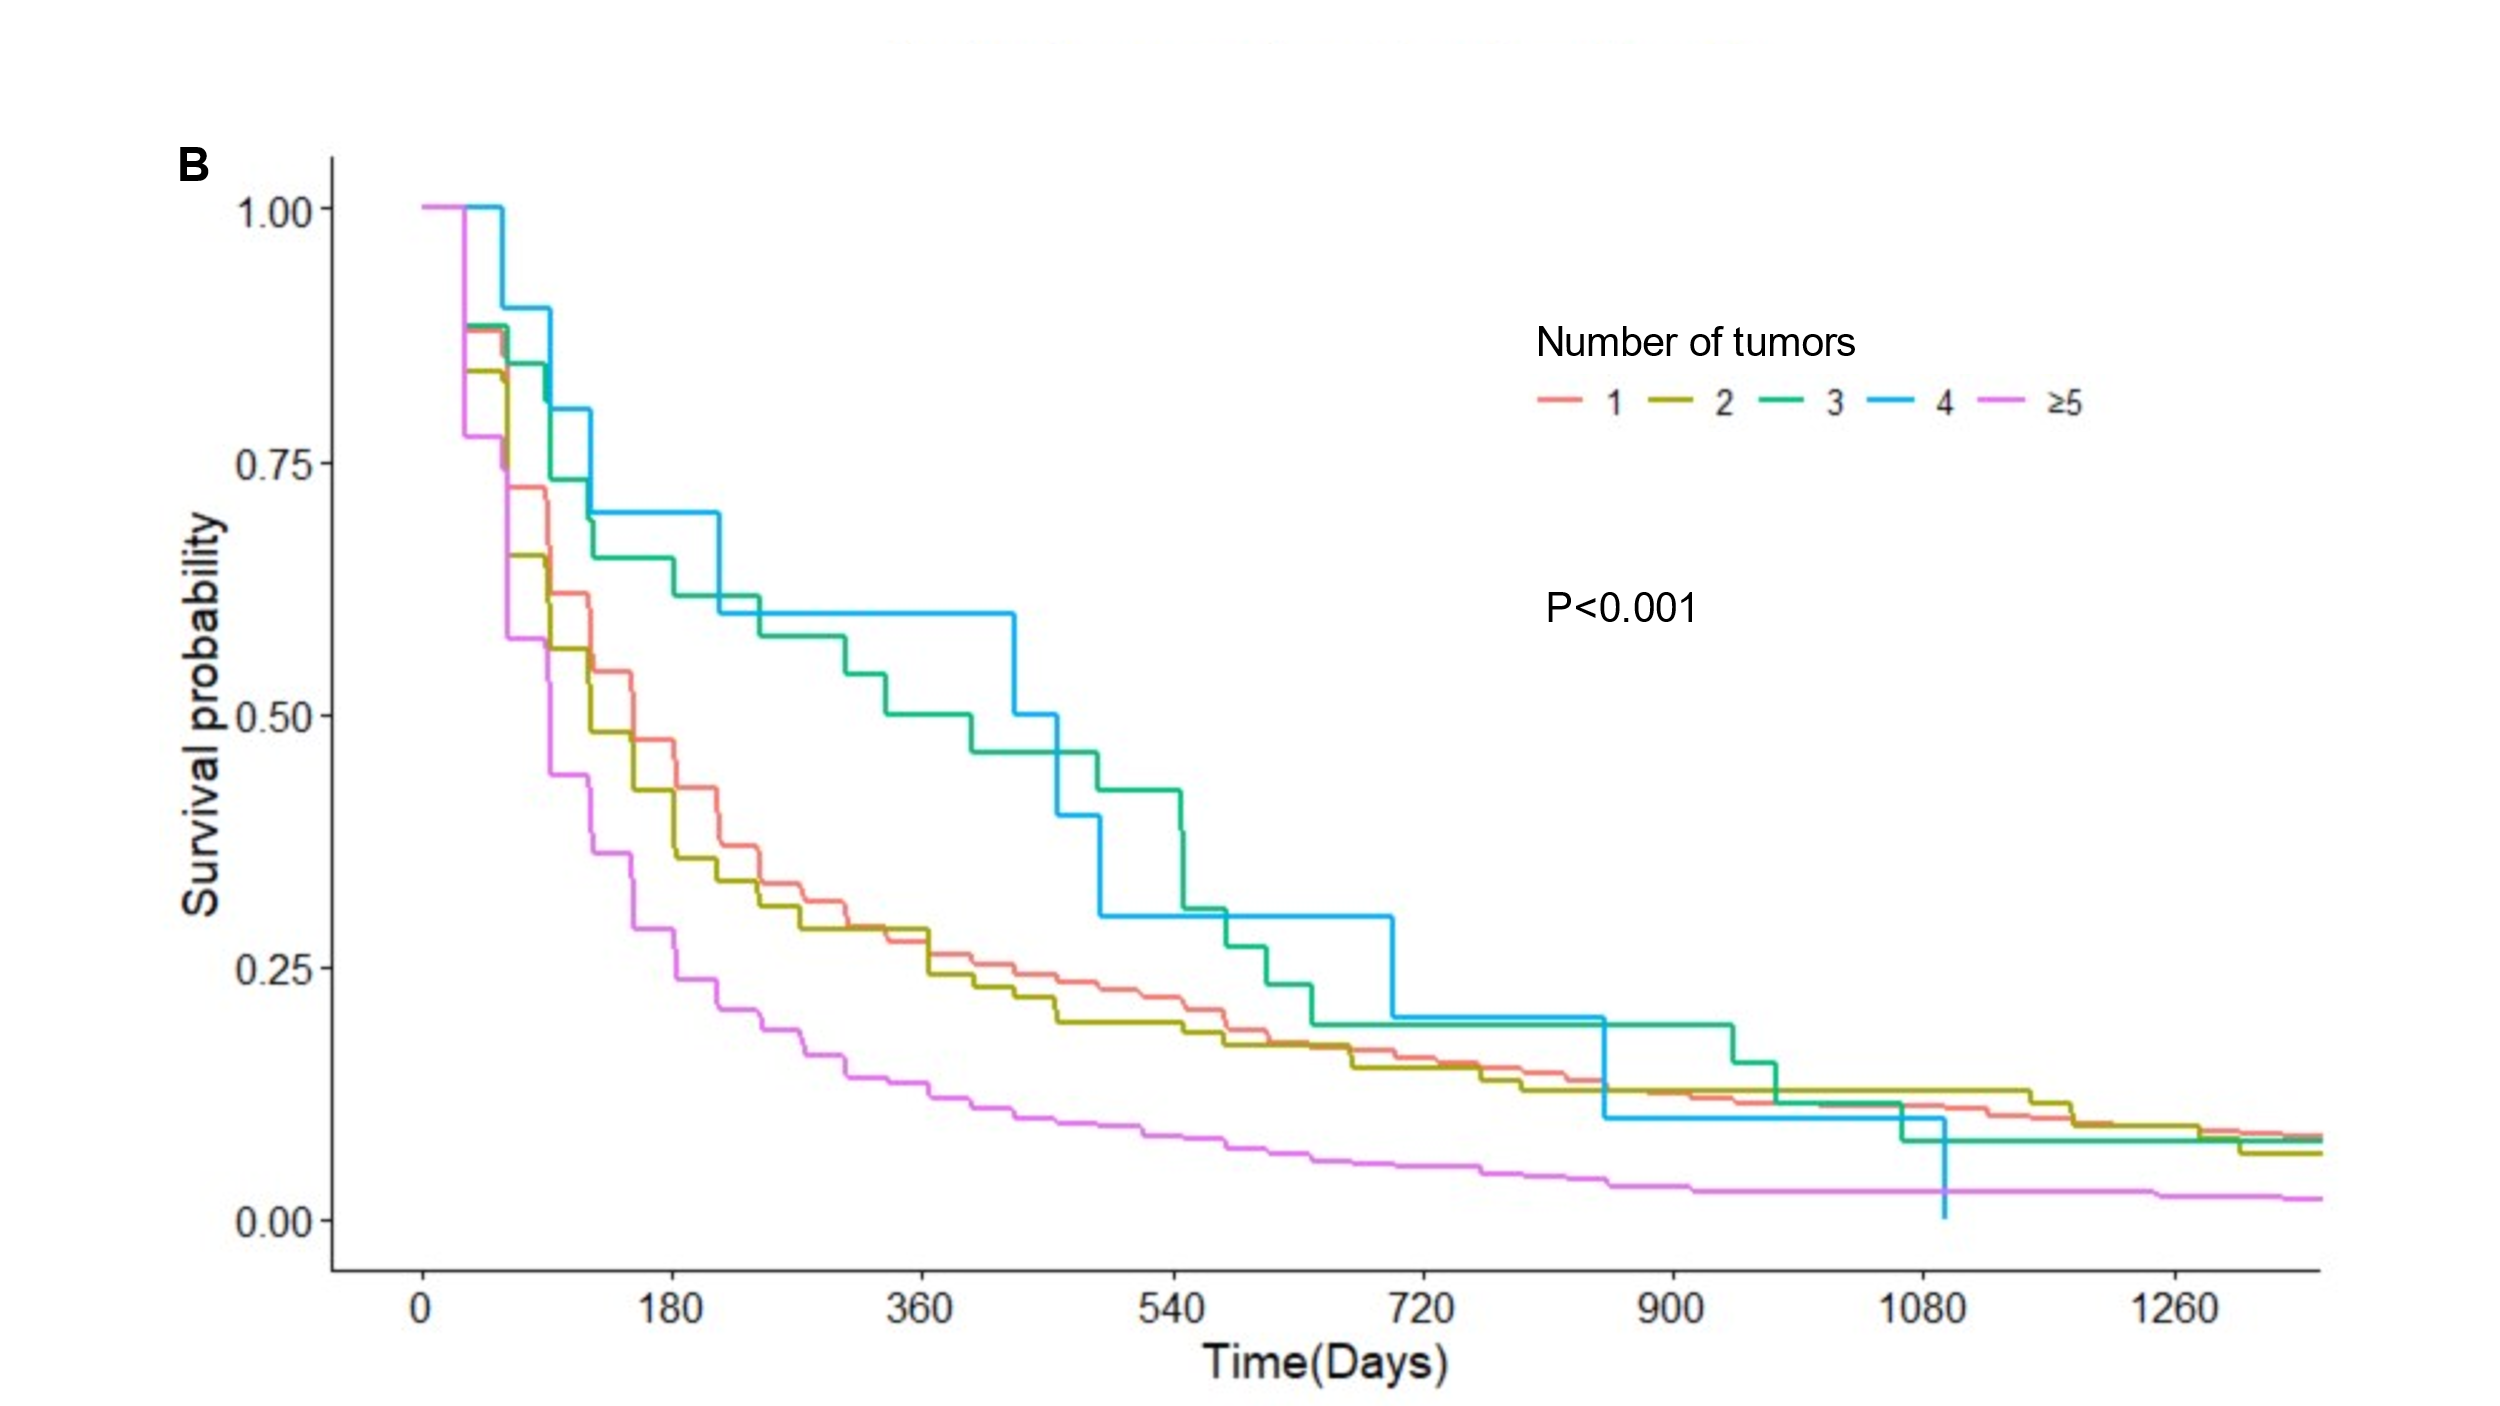


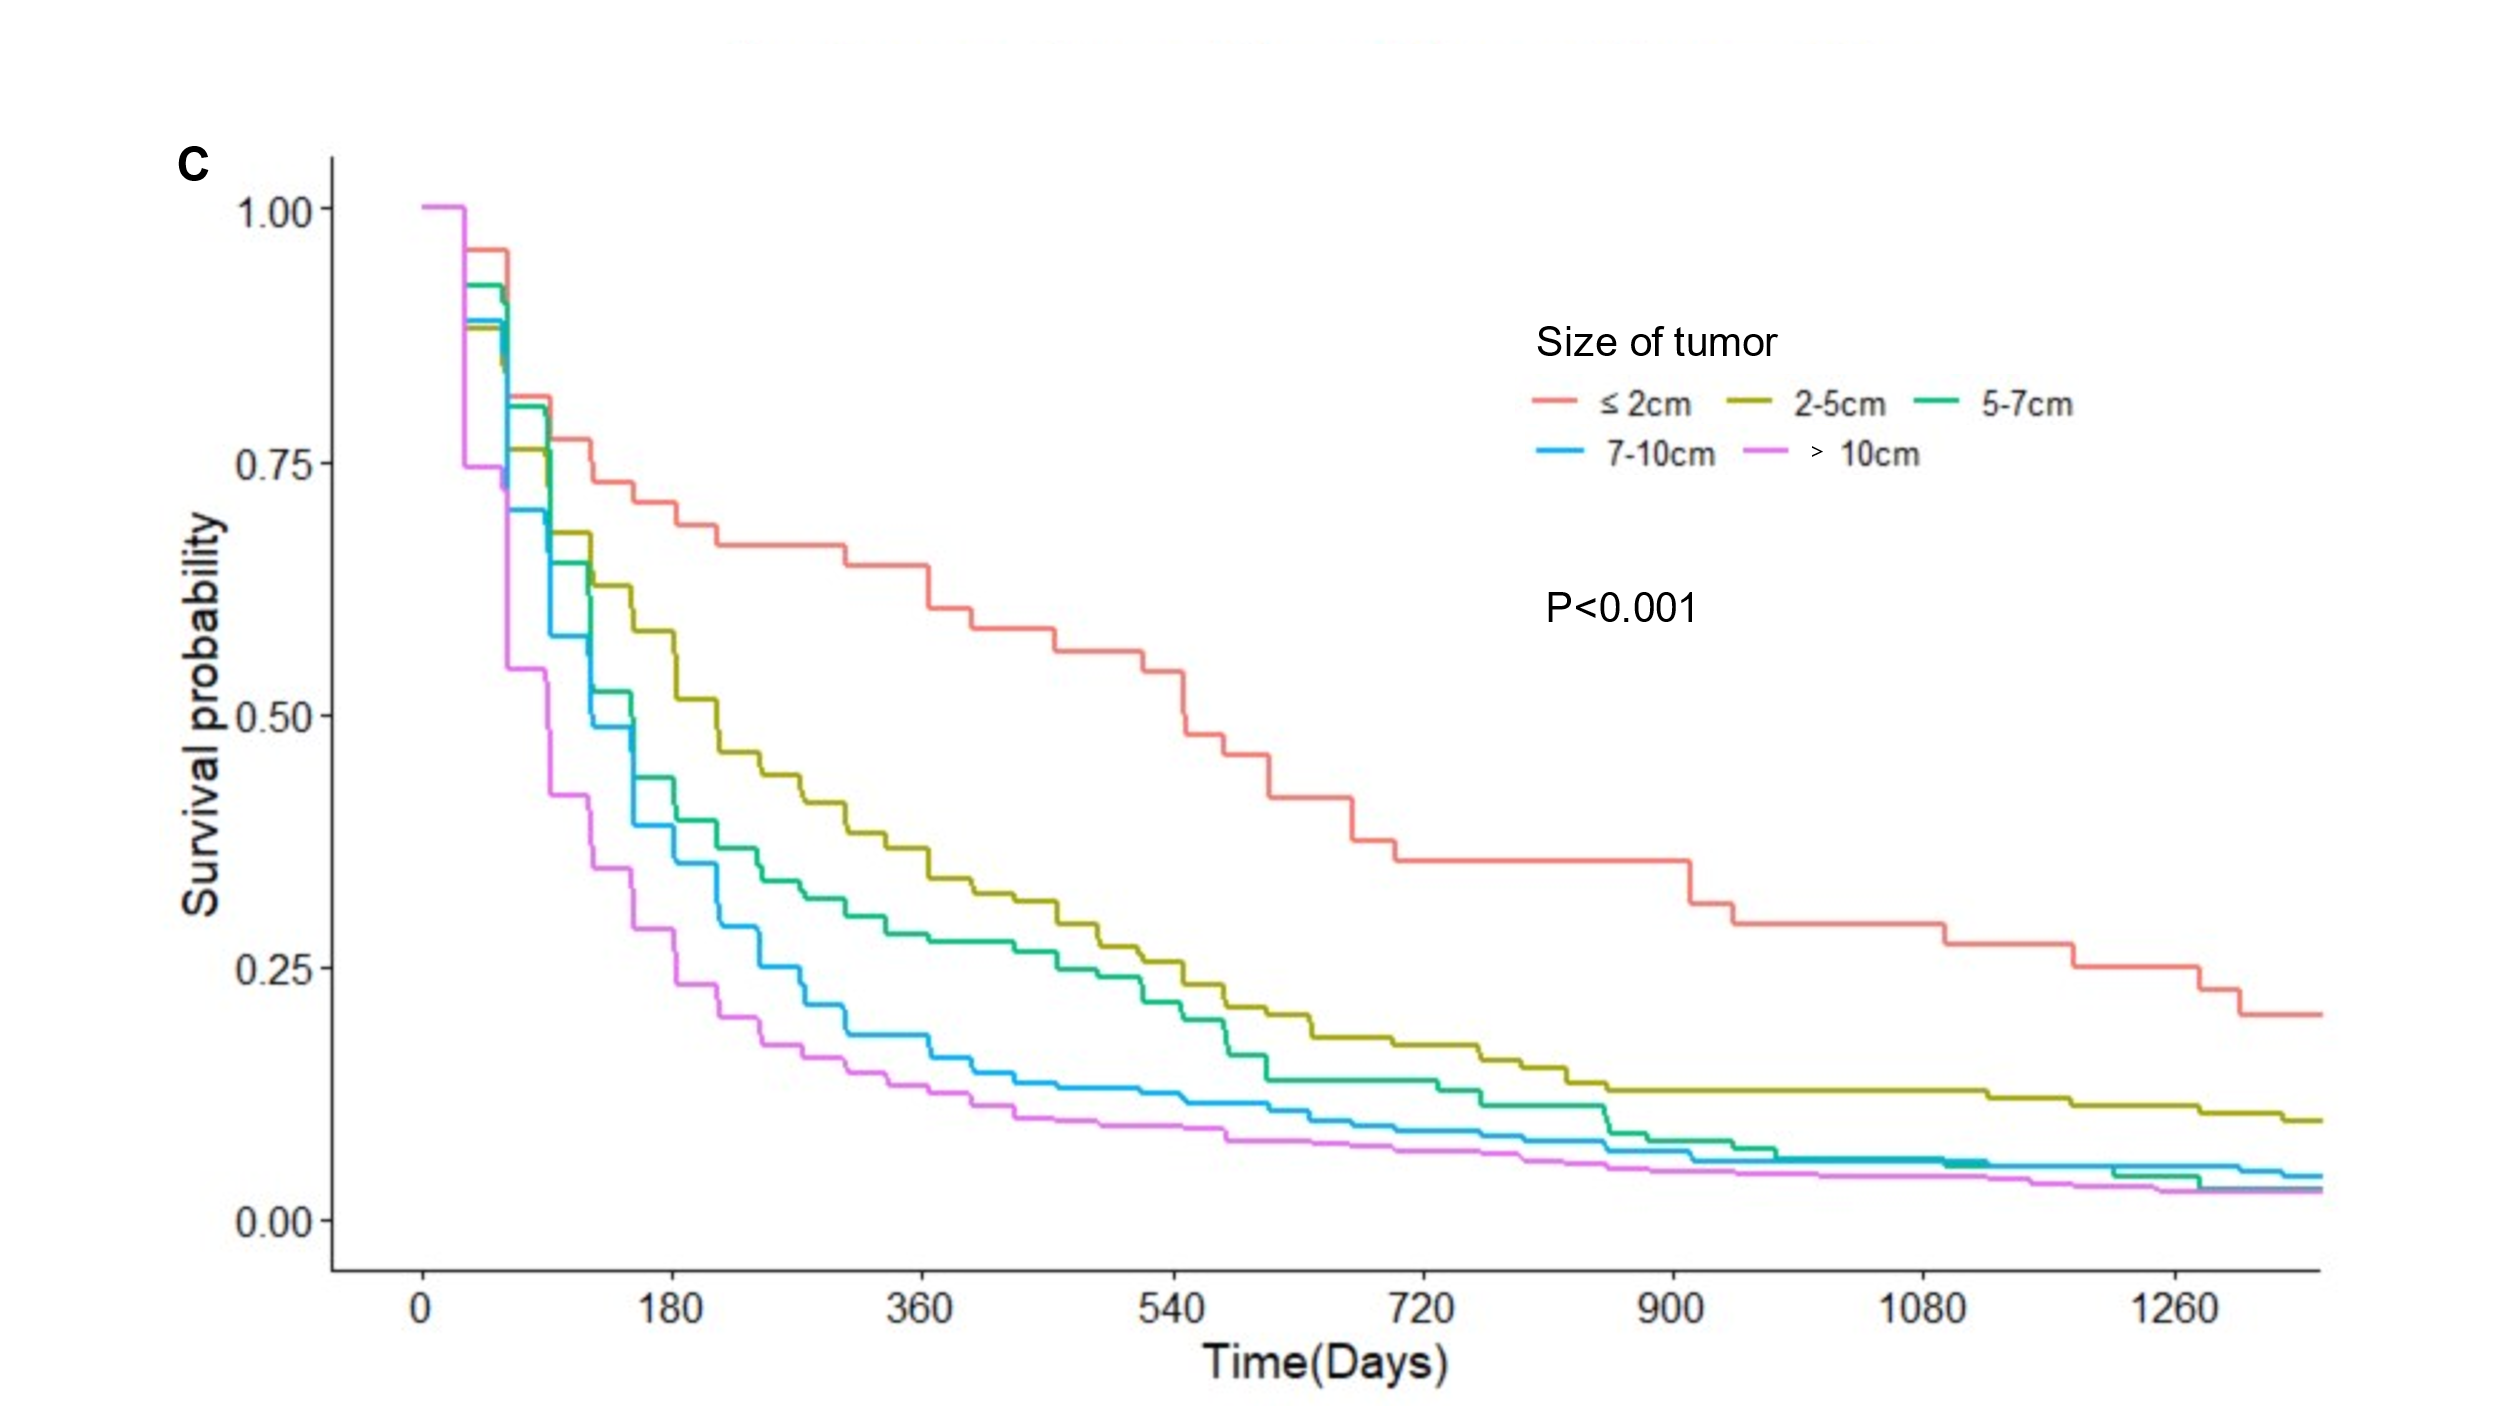


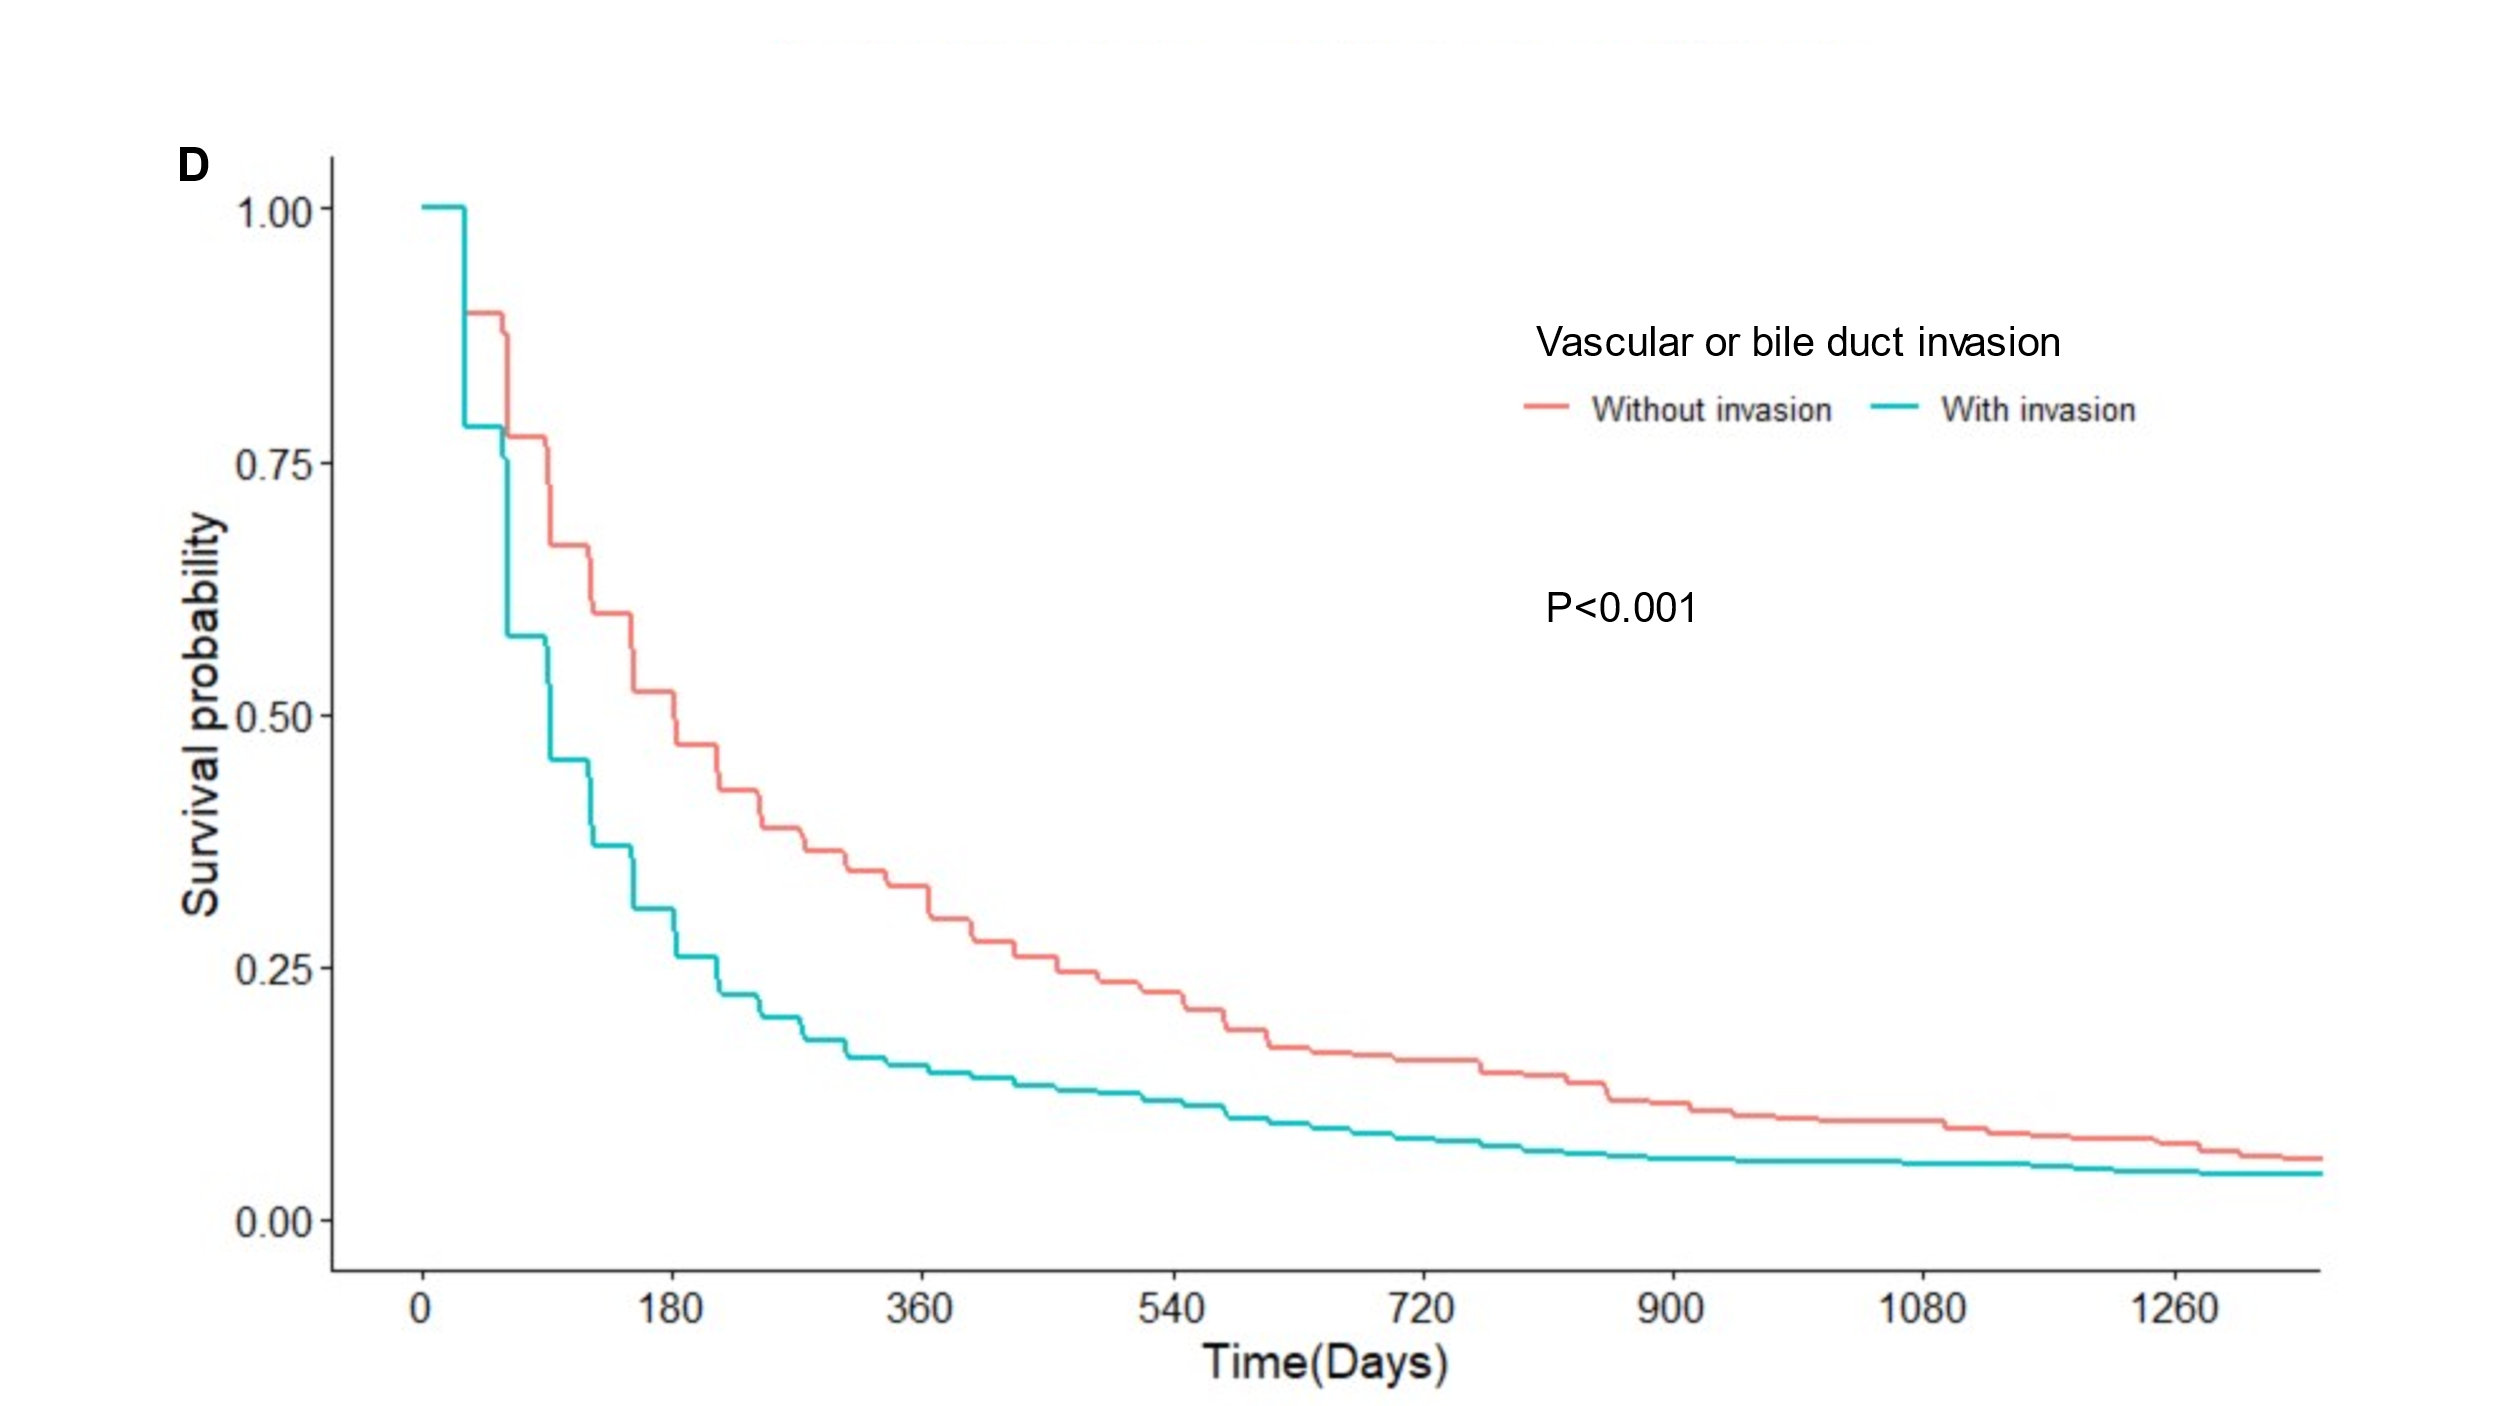


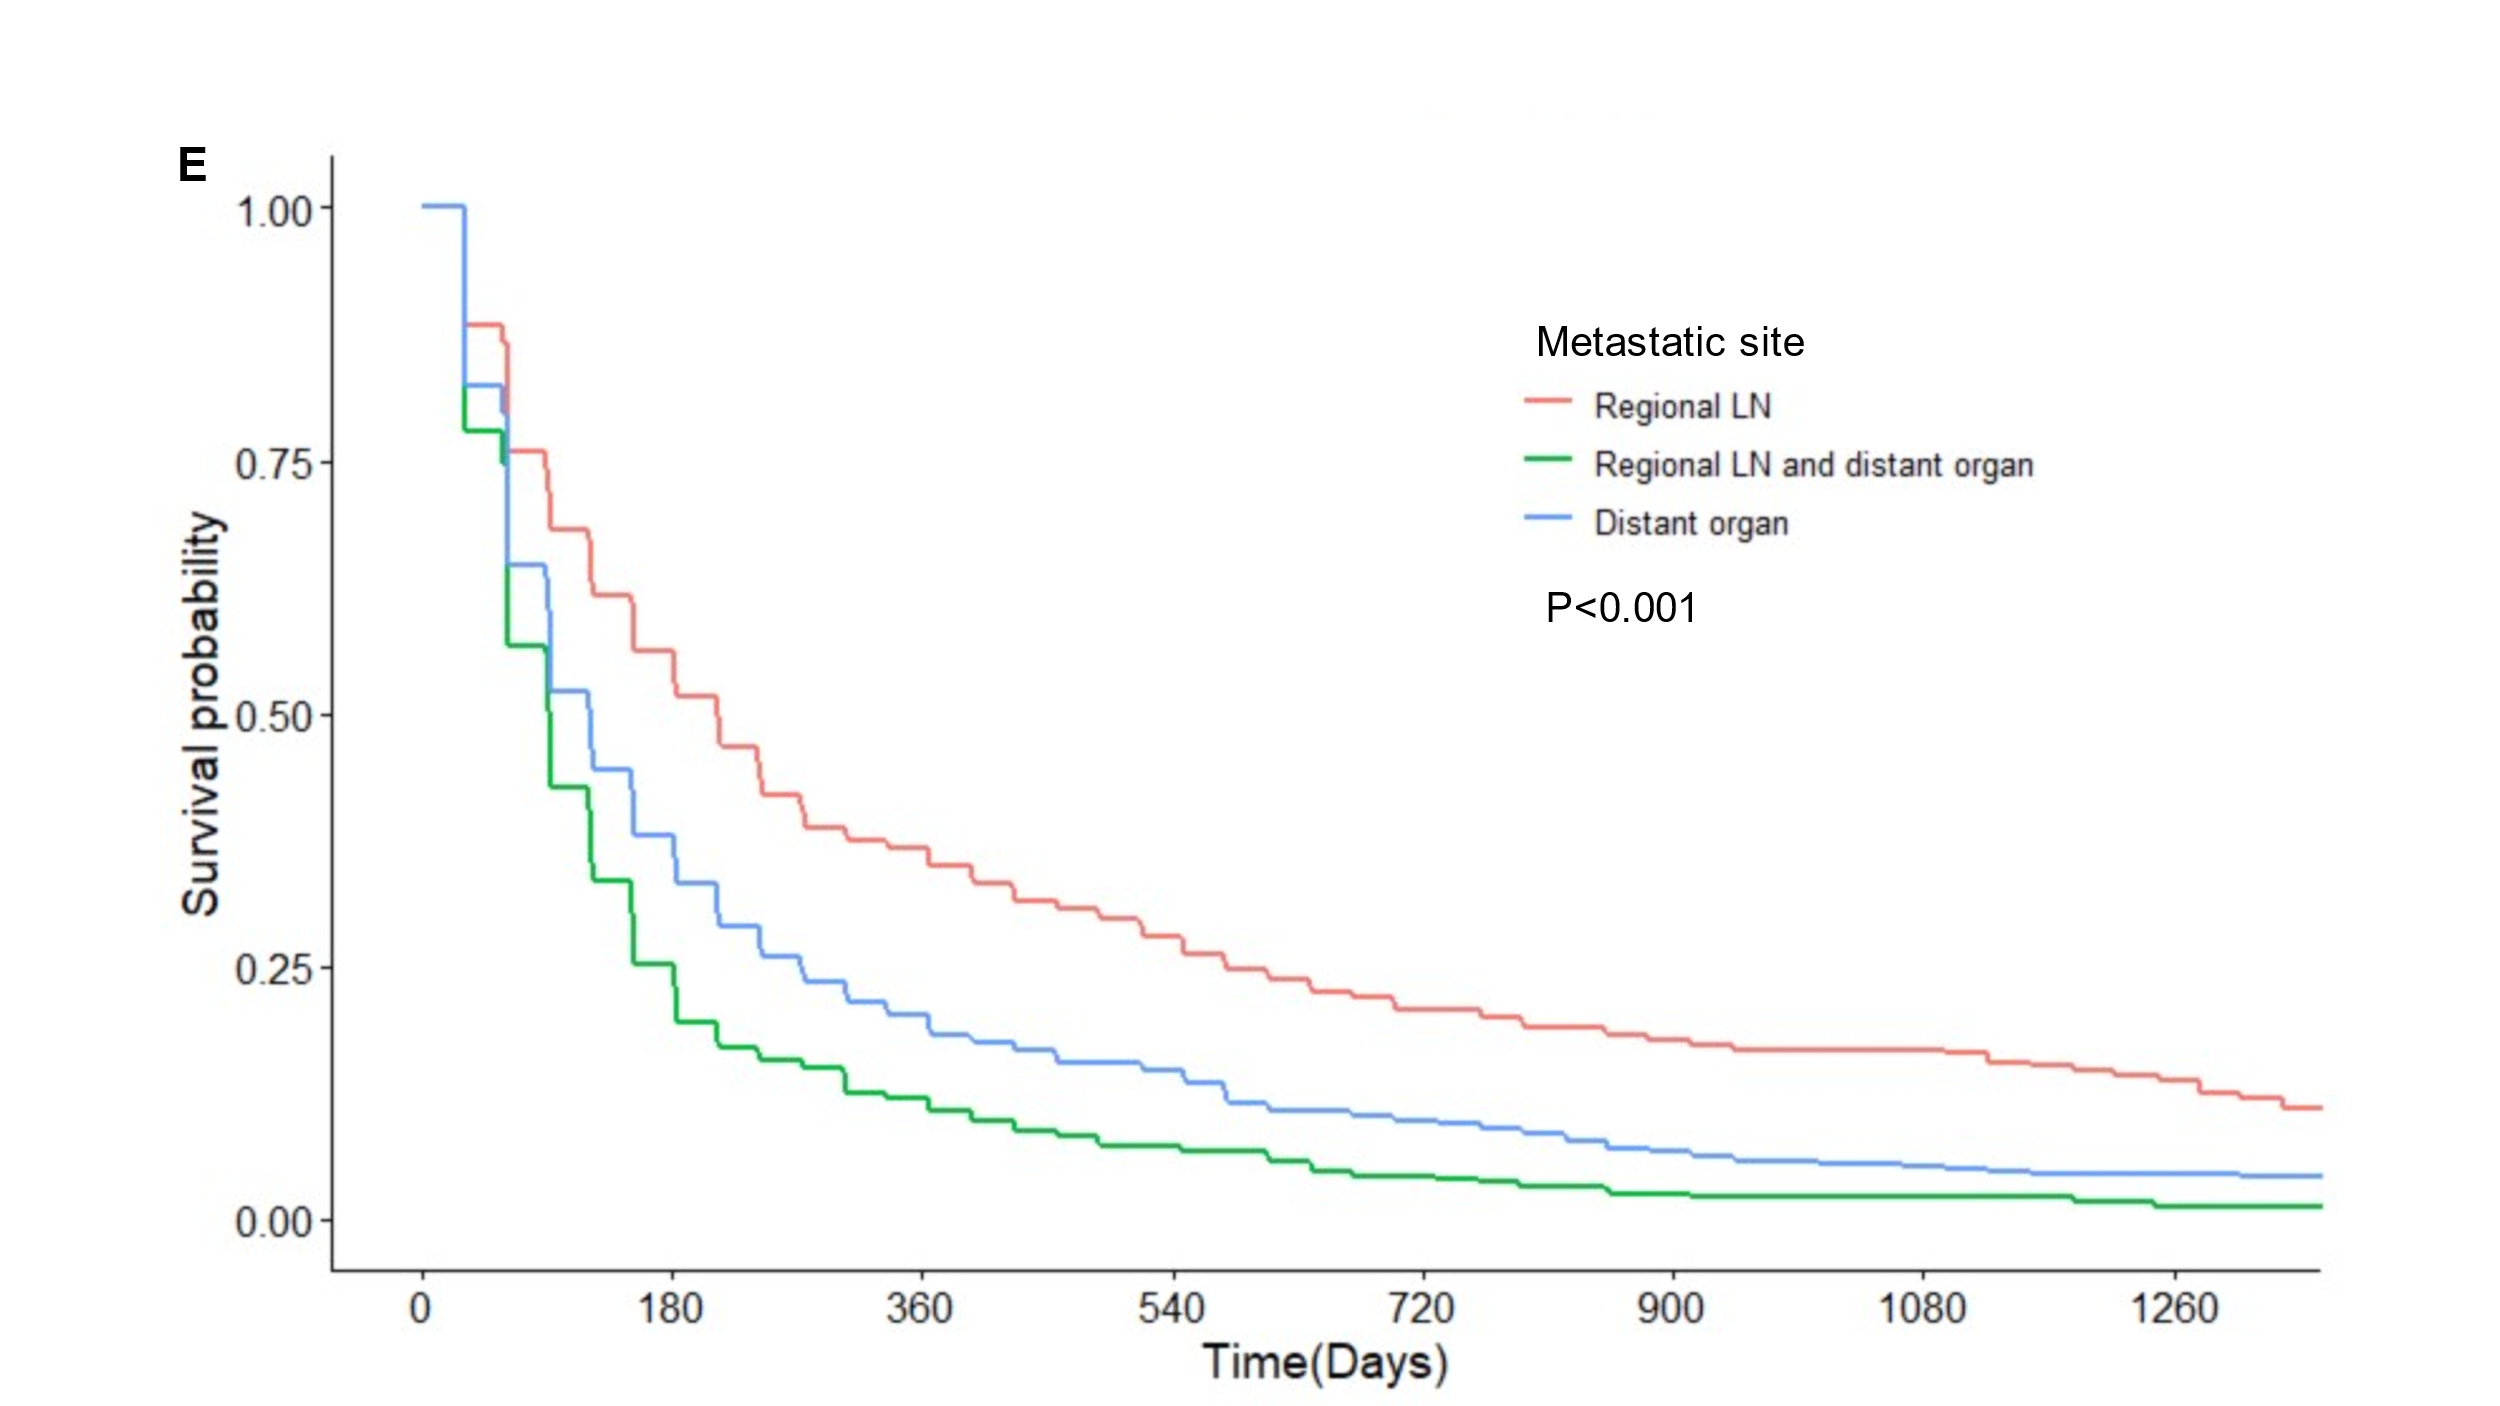

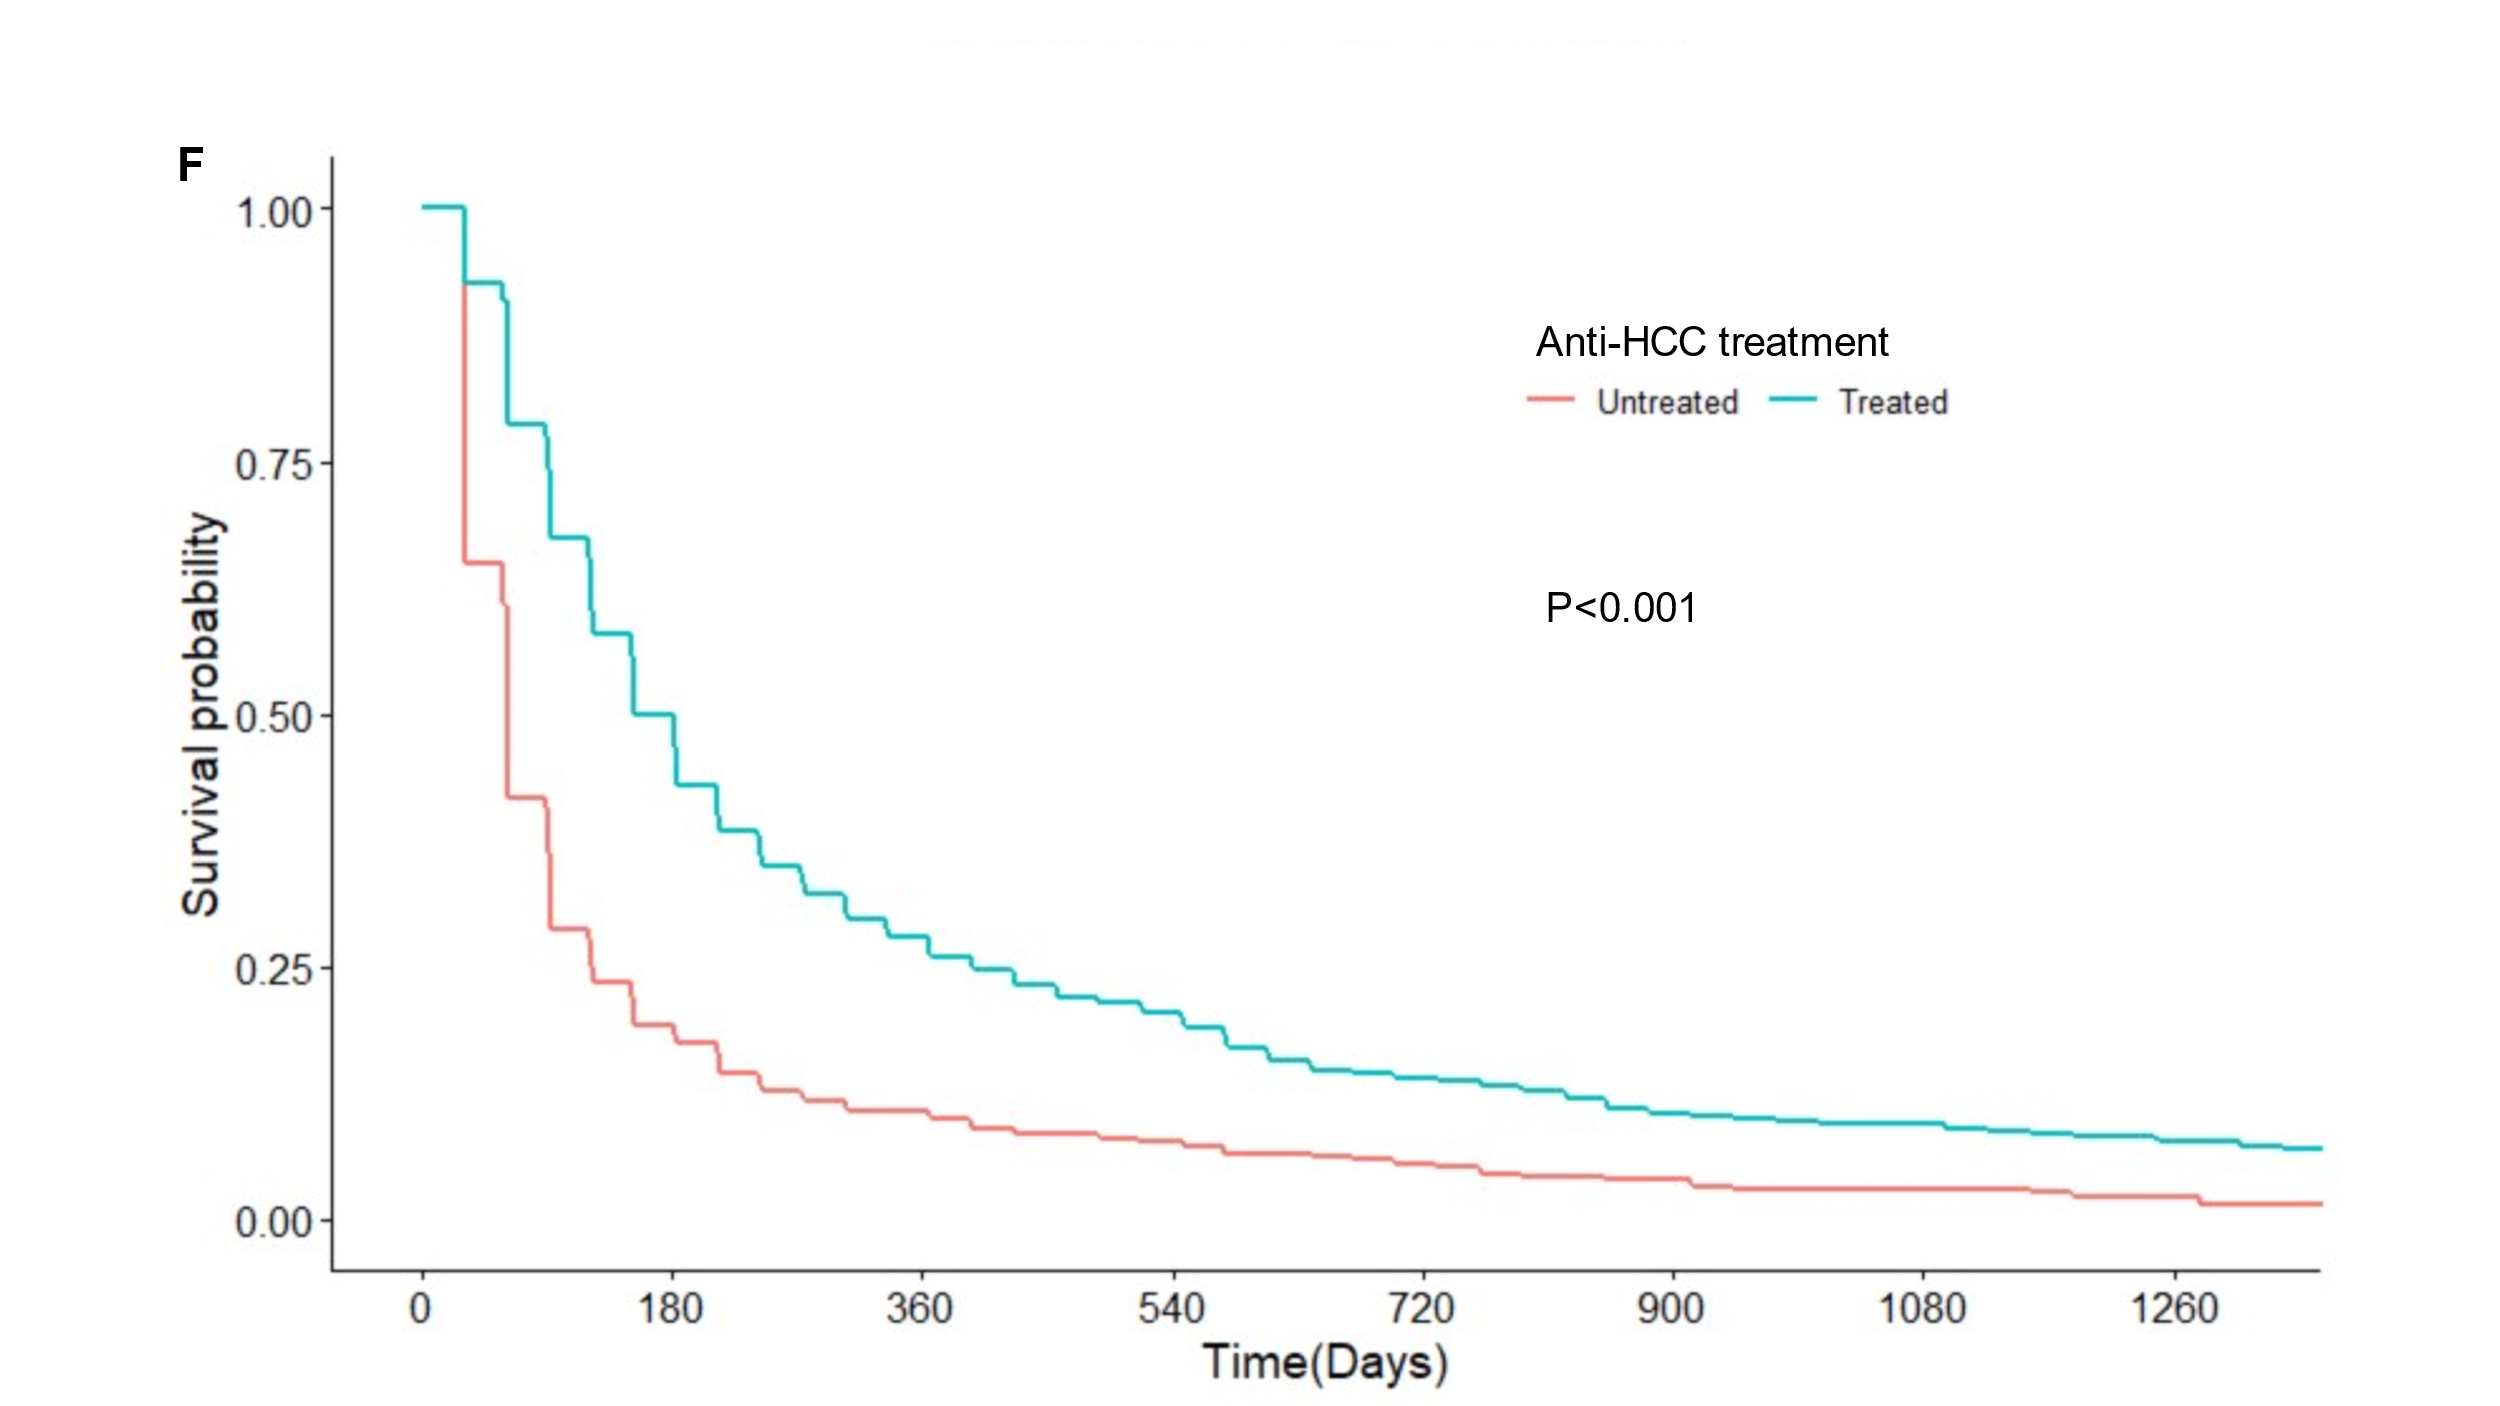


Abbreviations: LN, lymph node

**Supplementary Figure 2.** Decision trees for (A) 3-, (B) 6-, and (C) 12- months survival prediction model.


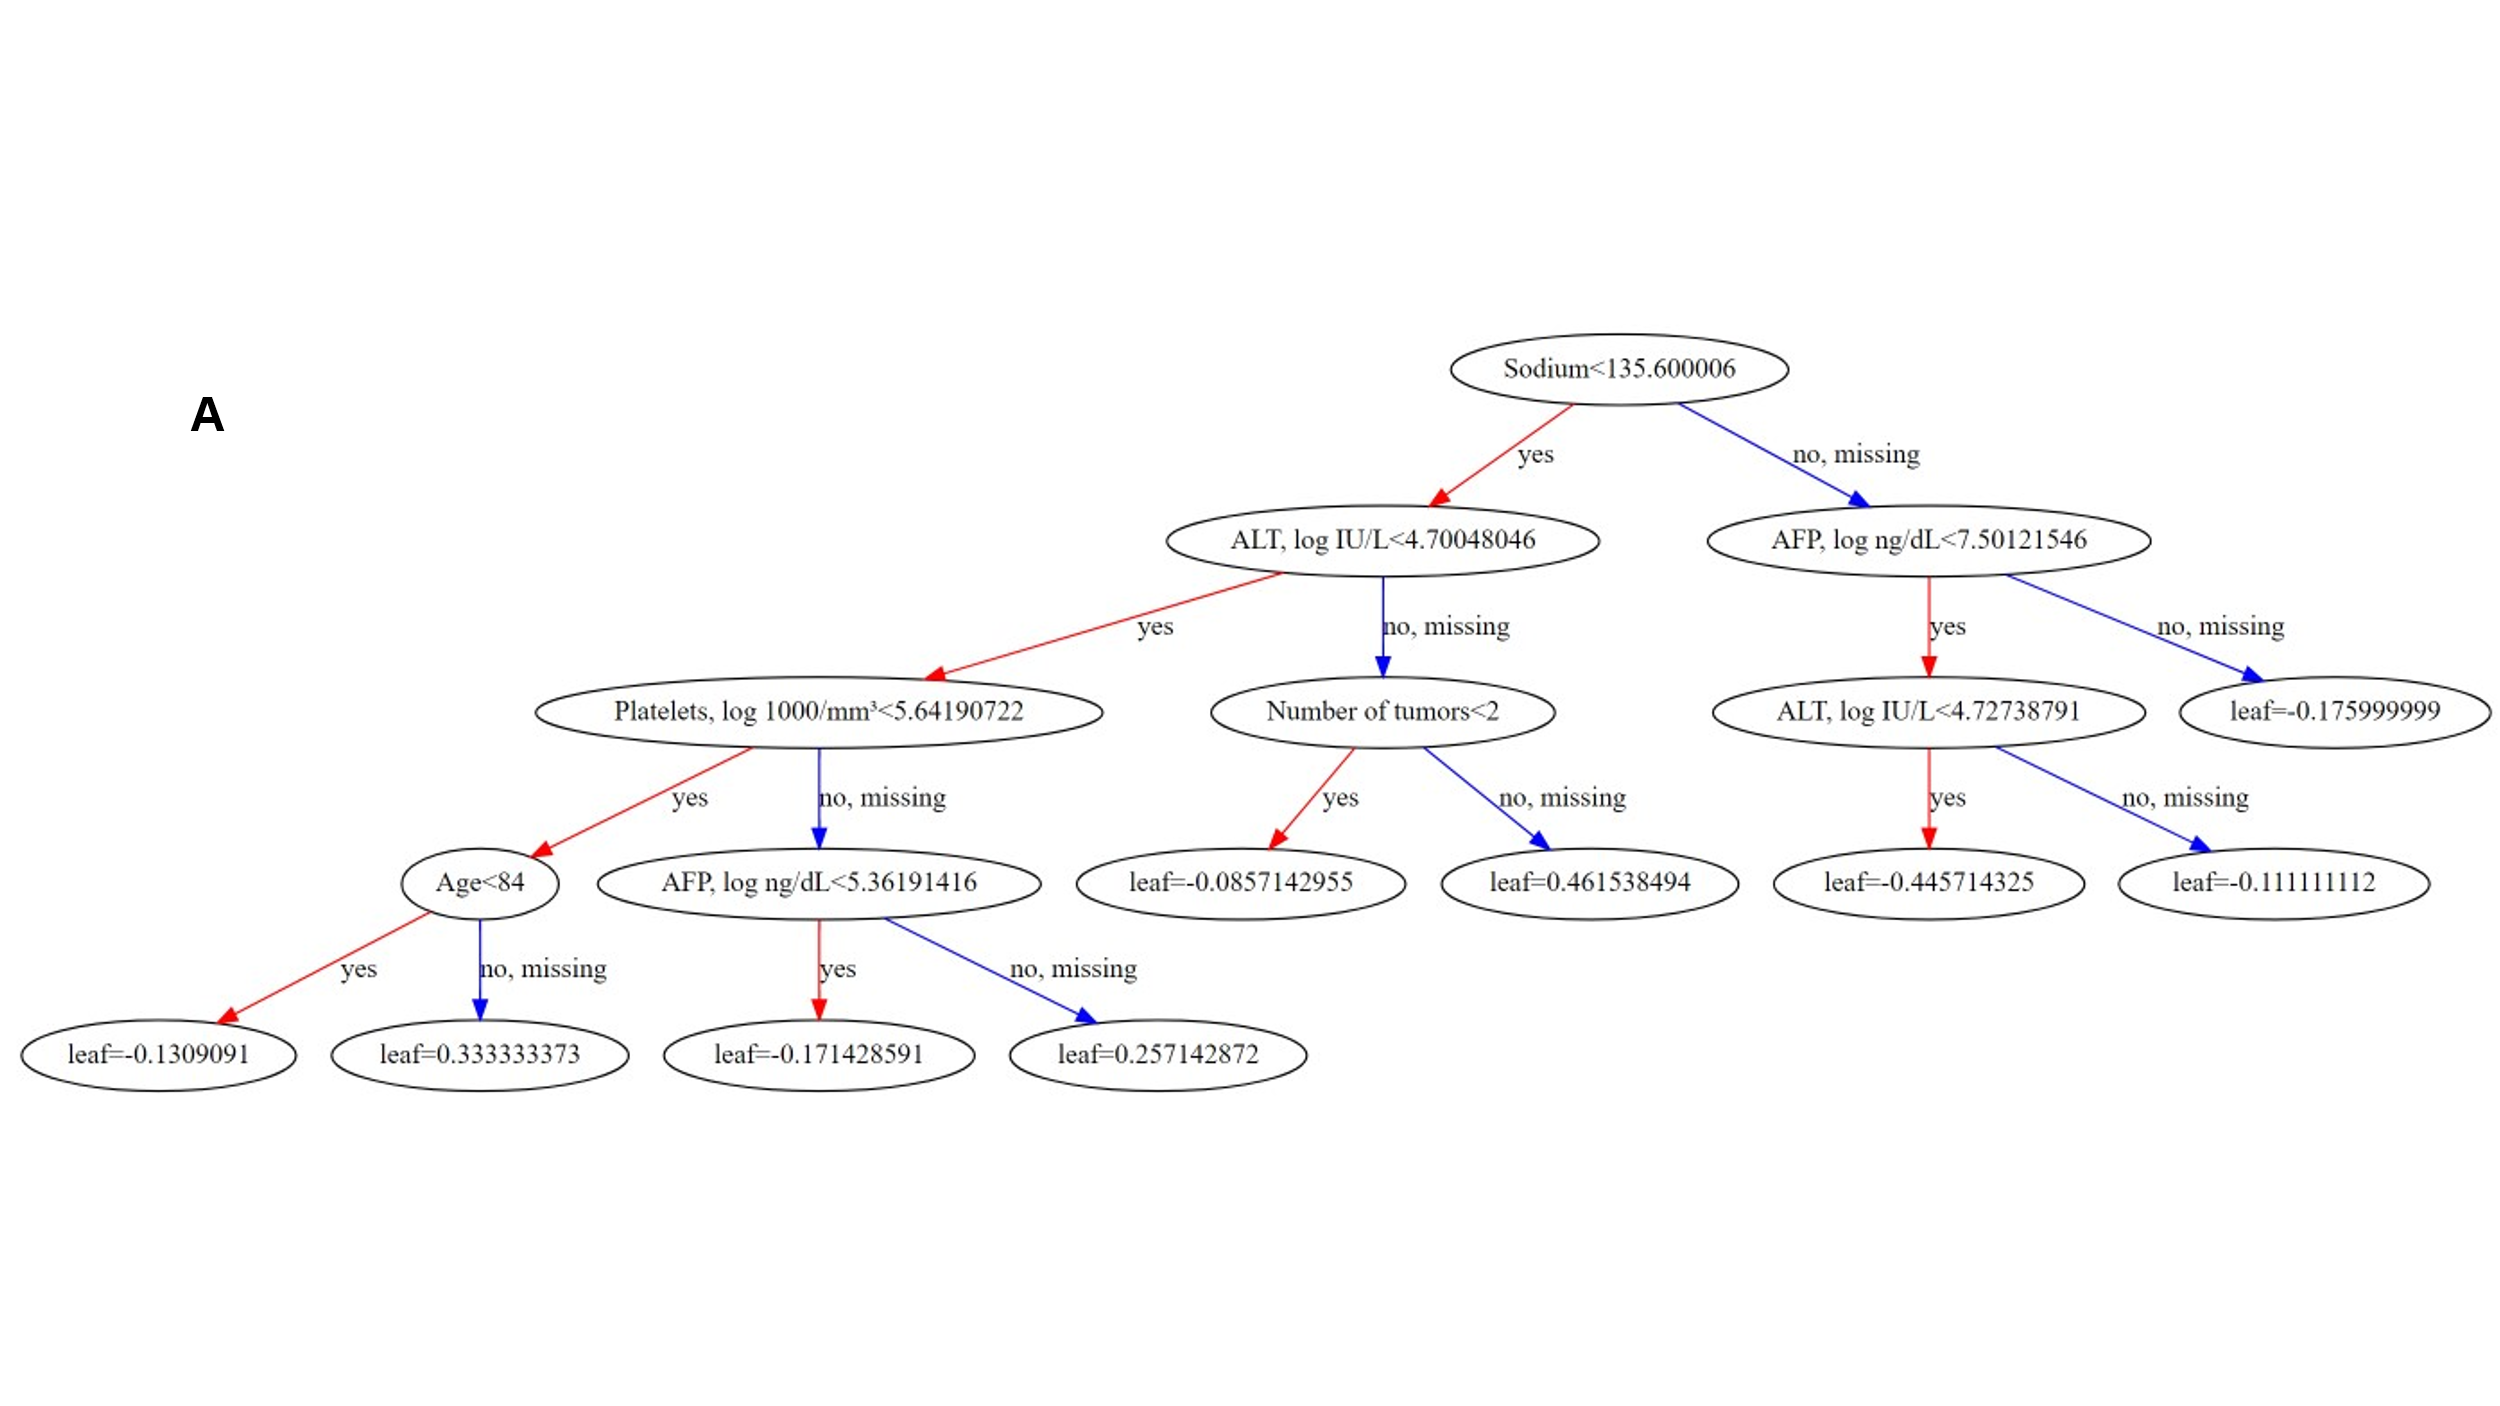


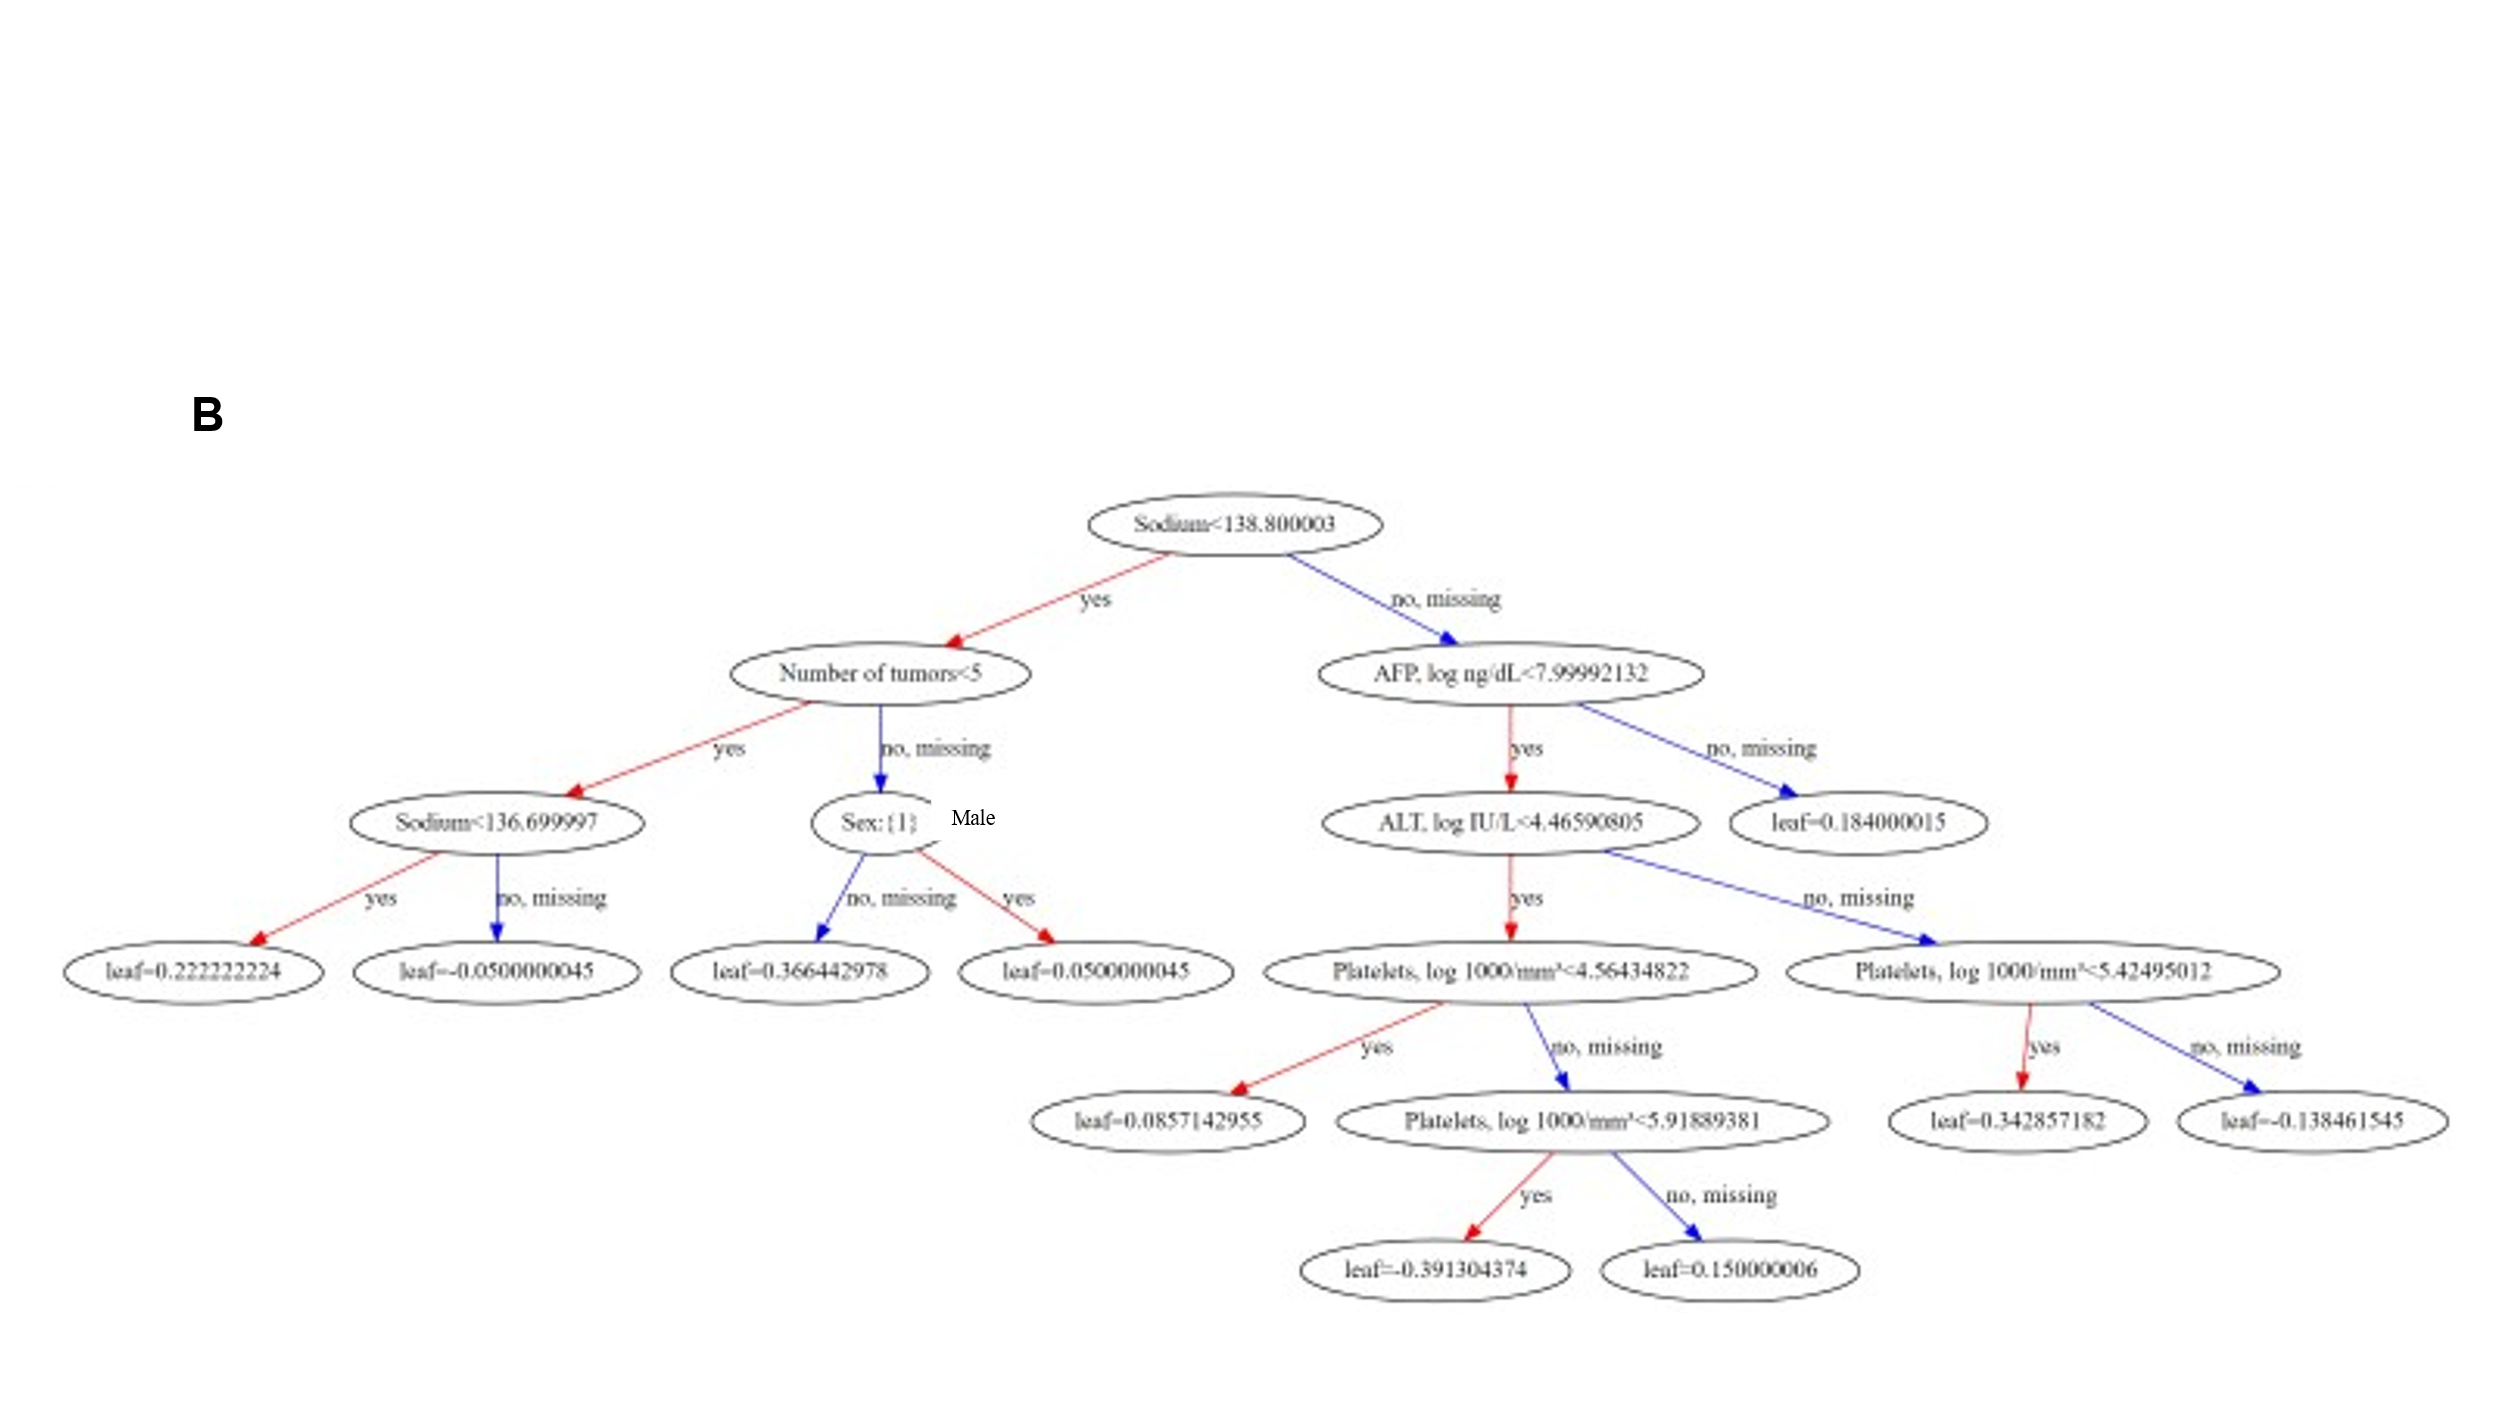


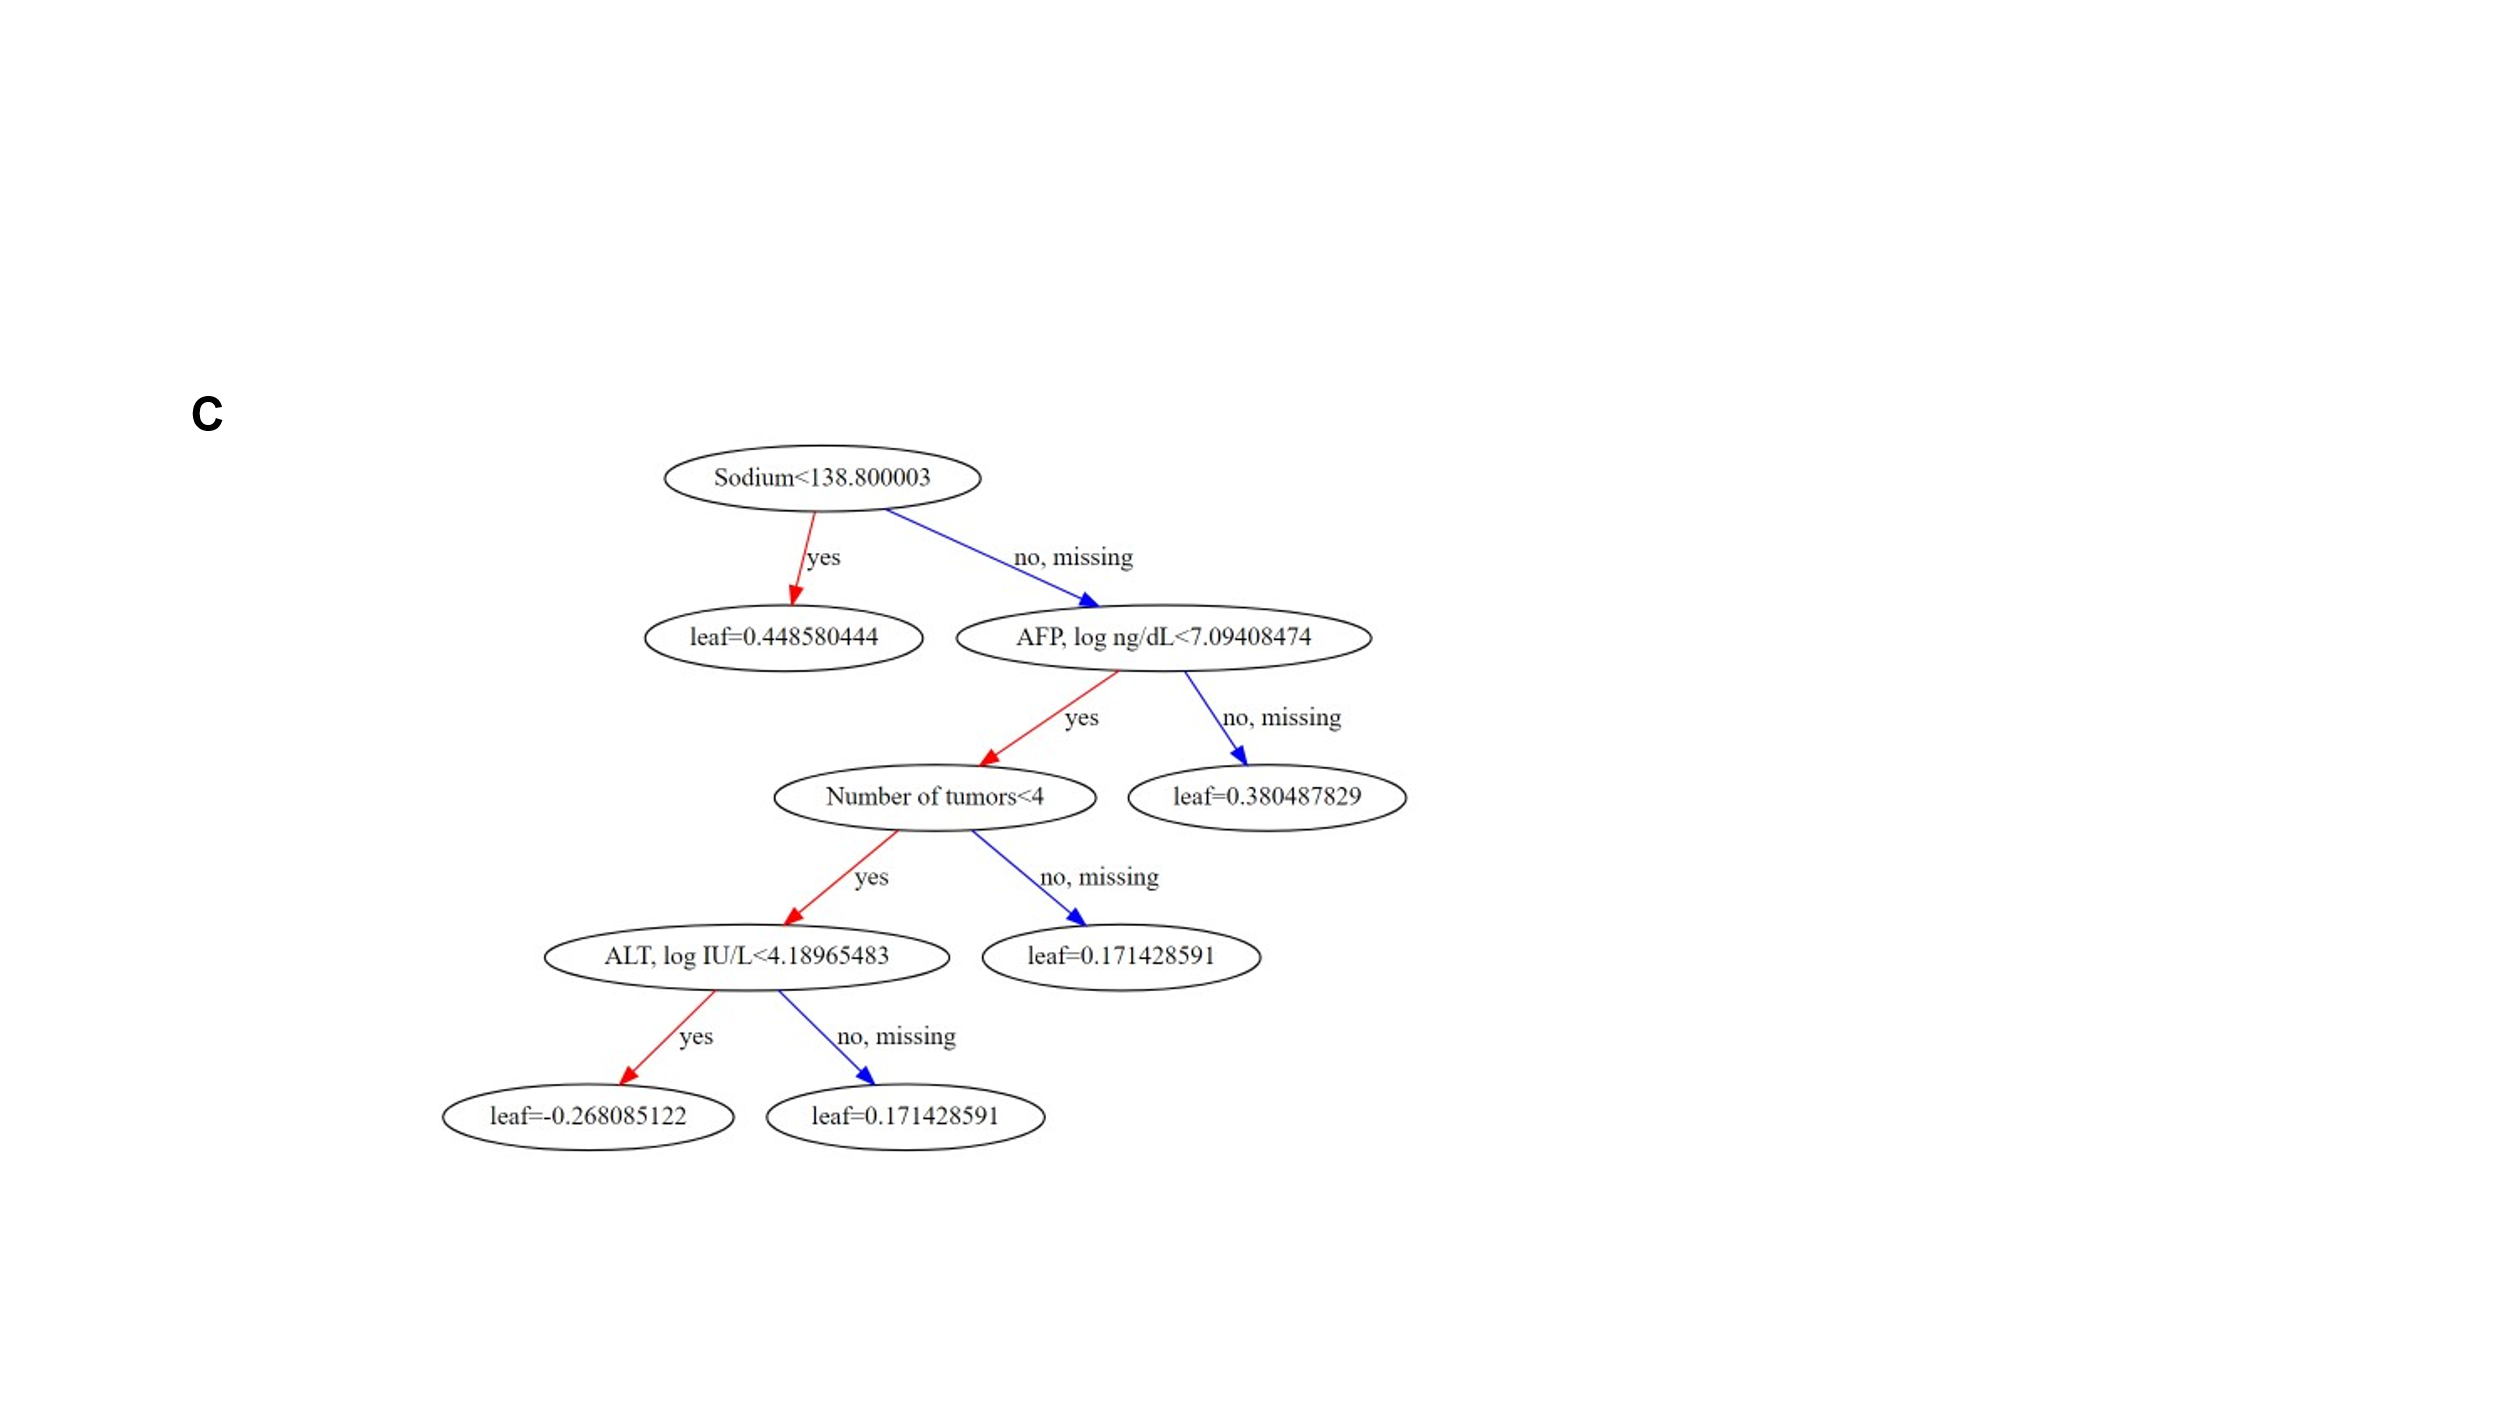

Supplement: Supplementary file 1 [file get_supplementary_file.php]
